# Supplementary material for: A new approach to stereospecific synthesis of P-chiral phosphorothioates. Preparation of diastereomeric dithymidyl-(3′-5′) phosphorothioates
Source: Royal Society of Chemistry journal article supplement (doi:10.1039/b311912b), 2004-01-01

## Supplementary material

### Materials and Methods

<sup>31</sup>P NMR experiments were carried out in 10-mm NMR tubes and spectra were recorded on a Varian 300 MHz spectrometers using 2% H<sub>3</sub>PO<sub>4</sub> in D<sub>2</sub>O as an external standard (coaxial inner tube). Anhydrous solvents for the studies were prepared in the following way: pyridine (ScanLab), acetonitrile (ScanLab) and triethylamine (Aldrich), and *t*-butylamine (Aldrich) were refluxed with CaH<sub>2</sub> and then distilled and stored over molecular sieves (4Å) or CaH<sub>2</sub> (triethylamine). Methylene chloride was freshly distilled from CaH<sub>2</sub>. Pivaloyl chloride (Aldrich) was distilled under atmospheric pressure and stored at -20 °C in a sealed flask. 5'-*O*-(*tert*-butyldiphenylsilyl)thymidine,<sup>1</sup> 3'-*O*-(*tert*-butyldiphenylsilyl)thymidine,<sup>2</sup> 2-chloro-5,5-dimethyl-2-oxo-1,3,2-dioxaphosphinane (NEP-Cl)<sup>3</sup> and 4-methoxy-2-pyridine methanol 1-oxide<sup>4</sup> were obtained according to the published procedures. 9-Fluorenemethyl H-phosphonate **1** was prepared *via* transesterification of diphenyl H-phosphonate with 9-fluorene-methanol, analogously to other alkyl H-phosphonate monoesters.<sup>5</sup> Nucleosides, snake venom phosphodiesterase (SVPD, *Crotalus atrox*) and nuclease P1 were purchased from Sigma. All isolated compounds were of purity >98% (<sup>1</sup>H NMR spectroscopy). Final products **6a** and **6b** obtained in these studies were identical with genuine samples obtained on another way.

#### *4-Methoxy-1-oxido-2-picolyl 9-fluorenemethyl phosphorothioate, triethylammonium salt 2.*

9-Fluorenemethyl phosphonic acid **1** and 4-methoxy-2-pyridine methanol 1-oxide were coevaporated with added pyridine - TEA (4:1 v/v, 10 mL), followed by pyridine (2 x 10 mL). The mixture was dissolved in pyridine (10 mL) and NEP-Cl (0.44 g, 2.4 mmol) was added during stirring. The reaction was allowed to stand for 10 min. Water (0.043 mL, 2.4 mmol) was added and after an additional minute sulfur (0.16 g, 4.8 mmol). After 2 h the solvent was evaporated and the resultant oil dissolved in chloroform (50 mL) washed with 1 M TEAB (50 mL) followed by sat. Na<sub>2</sub>S<sub>2</sub>O<sub>3</sub> (50 mL) the organic phase was dried over Na<sub>2</sub>SO<sub>4</sub> and the solvent was evaporated. Silica gel column chromatography using a stepwise gradient of MeOH (0-25%) in CHCl<sub>3</sub> containing 0.1% TEA gave **2** (0.4 g, 63% yield) as a white solid. Anal. C<sub>27</sub>H<sub>35</sub>N<sub>2</sub>O<sub>5</sub>PS: C 61.12; H 6.65; N 5.28. Found: C 61.25; H 6.53; N 5.33. δ<sub>H</sub> (CDCl<sub>3</sub>)

0.96 (9 H, t,  $J = 7.1$  Hz, CH<sub>3</sub>), 2.69 (6 H, q,  $J = 7.1$  Hz CH<sub>2</sub>), 3.49 (3 H, s, OCH<sub>3</sub>), 4.11 (1 H, m,  $J = 6.3$  Hz, OCH<sub>2</sub>), 4.27 (2 H, m,  $J = 7.1$  Hz, CH), 5.02 (2 H, t,  $J = 8.8$  Hz, OCH<sub>2</sub>), 6.53 (1 H, dd,  $J = 3.3$  Hz, 6''-CH), 6.96 (1 H, d,  $J = 3.3$  Hz, 5''-CH), 7.24 (2 H, t,  $J = 2.2$  and 7.1 Hz, H<sub>arom</sub>), 7.59 (4 H, q,  $J = 7.1$  Hz, H<sub>arom</sub>), 7.24 (2 H, t,  $J = 7.4$  Hz, H<sub>arom</sub>), 7.59 (4 H, q,  $J = 7.1$  Hz, H<sub>arom</sub>), 7.91 (1 H, d,  $J = 7.1$  Hz, 3''-CH) and 11.20 (1 H, s, NH).  $\delta_P$  (CDCl<sub>3</sub>) 56.38 ppm.  $\delta_C$  (CDCl<sub>3</sub>) 8.61, 21.49, 32.23, 32.29, 45.69, 48.30, 48.42, 53.89, 56.26, 62.14, 62.19, 67.93, 68.01, 76.00, 76.07, 77.45, 77.88 and 78.33.

*5'-O-tert-Butyldiphenylsilylthymidin-3'-yl 9-fluorenylmethyl 1-oxido-4-methoxy-2-picolyl phosphorothioates 3a and 3b (fast and slow isomers).*

**2** (0.36 g, 0.67 mmol) and *5'-O-(tert-butyl)diphenylsilyl*thymidine (0.39 g, 0.80 mmol) were coevaporated with added pyridine (2 x 5 mL) dissolved in pyridine (5.6 mL) and NEP-Cl (0.37 g, 2.01 mmol) was added. The reaction was followed in NMR and after 40 minutes the reaction was complete. The mixture was poured into EtOAc (50 mL) and washed with sat. NaCl (50 mL). The organic phase was dried over Na<sub>2</sub>SO<sub>4</sub> and the solvent was evaporated. Silica gel column chromatography using a stepwise gradient of *i*PrOH (0-10%) in CHCl<sub>3</sub> containing 0.1% HOAc gave fast isomer **3a** [0.29 g, 48%;  $R_f = 0.48$  in CHCl<sub>3</sub> : CH<sub>3</sub>OH (9:1, v/v)], slow isomer **3b** [0.11 g, 18%;  $R_f = 0.37$  in CHCl<sub>3</sub> : CH<sub>3</sub>OH (9:1, v/v)] and a mixed fraction of isomers (0.14 g, 24%). <sup>1</sup>H NMR **3a**,  $\delta_H$  (CDCl<sub>3</sub>) 1.07 (9 H, s, *tert*-butyl), 1.57 (3 H, s, CH<sub>3</sub>), 2.19 (1 H, m,  $J = 6.59$  Hz, 2a'-H), 2.43 (1 H, m,  $J = 5.76$  Hz, 2b'-H), 3.69 (3 H, s, OCH<sub>3</sub>), 3.91 (2 H, m, 5'-H), 4.18 (1 H, m, 4'-H), 4.25 (1 H, t, CH), 4.51 (2 H, m, OCH<sub>2</sub>), 5.26 (2 H, d,  $J = 9.34$  Hz, OCH<sub>2</sub>), 5.30 (1 H, m, 3'-H), 6.44 (1 H, q, 6'-H), 6.81 (1 H, dd,  $J = 3.8$  Hz, 5''-CH), 6.88 (1 H, d,  $J = 2.7$  Hz, 6''-CH), 7.25-7.73 (19 H, m, 6-H and H<sub>arom</sub>), 8.22 (1 H, dd,  $J = 7.14$  Hz, 3''-CH) and 9.72 (1 H, s, NH).  $\delta_P$  (CDCl<sub>3</sub>) 66.93 ppm. <sup>1</sup>H NMR **3b**,  $\delta_H$  (CDCl<sub>3</sub>) 1.06 (9 H, s, *tert*-butyl), 1.60 (3 H, s, CH<sub>3</sub>), 2.24 (1 H, m,  $J = 6.9$  Hz, 2a'-H), 2.49 (1 H, dd,  $J = 5.5$  Hz, 2b'-H), 3.73 (3 H, s, OCH<sub>3</sub>), 3.83 (2 H, m, 5'-H), 4.02 (1 H, m, 4'-H), 4.18 (1 H, t, CH), 4.41 (2 H, m, OCH<sub>2</sub>), 5.28 (2 H, d, OCH<sub>2</sub>), 5.33 (1 H, m, 3'-H), 6.38 (1 H, q,  $J = 6.0$  Hz, 6'-H), 6.78 (1 H, dd,  $J = 3.8$  Hz, 5''-CH), 6.89 (1 H, d,  $J = 2.7$  Hz, 6''-CH), 7.22-7.68 (19 H, m, 6-H and H<sub>arom</sub>), 8.25 (1 H, dd,  $J = 7.14$  Hz, 3''-CH) and 10.0 (1 H, s, NH).  $\delta_P$  (CDCl<sub>3</sub>) 66.83 ppm.

*5'-O-tert-Butyldiphenylsilylthymidin-3'-yl 1-oxido-4-methoxy-2-picolyl phosphorothioate, triethylammonium salt 4a.*

**3a** (1.13 g, 1.26 mmol) was dissolved in pyridine-*tert*-butylamine (9:1, v/v, 50 mL) and the reaction mixture was stirred at room temperature for 15 min. The solvent was

evaporated in vacuum and the residue was partitioned between  $\text{CHCl}_3$  (2 x 100 mL) and 1M TEAB (100 mL). The organic phase was dried  $\text{Na}_2\text{SO}_4$  and the solvent was evaporated. Residual pyridine was removed by evaporation of added MeCN (2 x 50 mL).

Silica gel chromatography using a stepwise gradient of MeOH (0-25%) in  $\text{CHCl}_3$  containing TEA (0.1%) afforded the diester **4a** (0.87 g, 69 %) as a white foam. Anal.  $\text{C}_{29}\text{H}_{51}\text{N}_4\text{O}_9\text{PSSi}$ : C 50.42; H 7.44; N 8.11. Found: C 50.31; H 7.53; N 8.03.  $\delta_{\text{H}}$  ( $\text{CDCl}_3$ ) 1.04 (9 H, s, *tert*-butyl), 1.32 (9 H, t, 3 x  $\text{CH}_3$ ), 1.51 (3 H, s,  $\text{CH}_3$ ), 2.18 (1 H, m, 2a'-H), 2.64 (1 H, m, 2b'-H), 3.10 (6 H, q, 3 x  $\text{CH}_2$ ), 3.73 (3 H, s,  $\text{OCH}_3$ ), 3.93 (2 H, m, 5'-H), 4.28 (1 H, m, 4'-H), 5.22 (2 H, d,  $\text{OCH}_2$ ), 5.35 (1 H, m, 3'-H), 6.38 (1 H, q, 6'-H), 6.73 (1 H, dd, 5''-CH), 7.12 (1 H, d, 6''-CH), 7.27-7.66 (11 H, m, 6-H and  $\text{H}_{\text{arom}}$ ), 8.21 (1 H, dd 3''-CH), 9.69 (1 H, s, NH), 11.72 (1 H, s, NH).  $\delta_{\text{P}}$  ( $\text{CDCl}_3$ ) 57.78 ppm.

*5'-O-tert-Butyldiphenylsilylthymidin-3'-yl 1-oxido-4-methoxy-2-picolyl phosphorothioate, triethylammonium salt 4b.*

The triester **3b** (0.49 g, 0.43 mmol) was dissolved in pyridine-*tert*-butylamine (9:1, v/v, 20 mL) and the reaction mixture was stirred at room temperature for 15 min. The solvent evaporated in vacuum and the residue was partitioned between chloroform (2 x 50 mL) and 1 M TEAB (50 mL). The organic phase was dried  $\text{Na}_2\text{SO}_4$  and the solvent was evaporated. Residual pyridine was removed by evaporation of added MeCN (2 x 50 mL).

Silica gel chromatography using a stepwise gradient of MeOH (0-25%) in  $\text{CHCl}_3$  containing TEA (0.1 %) afforded **4b** (0.33 g, 83 %) as a white foam. Anal.  $\text{C}_{29}\text{H}_{51}\text{N}_4\text{O}_9\text{PSSi}$ : C 50.42; H 7.44; N 8.11. Found: C 50.28; H 7.49; N 8.15.  $\delta_{\text{H}}$  ( $\text{CDCl}_3$ ) 1.03 (9 H, s, *tert*-butyl), 1.28 (9 H, t, 3 x  $\text{CH}_3$ ), 1.45 (3 H, s,  $\text{CH}_3$ ), 2.10 (1 H, m, 2a'-H), 2.53 (1 H, m, 2b'-H), 3.08 (6 H, q, 3 x  $\text{CH}_2$ ), 3.77 (3 H, s,  $\text{OCH}_3$ ), 3.95 (2 H, m, 5'-H), 4.29 (1 H, m, 4'-H), 5.28 (2 H, d,  $\text{OCH}_2$ ), 5.35 (1 H, m, 3'-H), 6.34 (1 H, q, 6'-H), 6.75 (1 H, dd 5''-CH), 7.17 (1 H, d, 6''-CH), 7.29-7.69 (11 H, m, 6-H and  $\text{H}_{\text{arom}}$ ), 8.37 (1 H, dd, 3''-CH), 9.70 (1 H, s, NH), 11.73 (1 H, s, NH).  $\delta_{\text{P}}$  ( $\text{CDCl}_3$ ) 57.94 ppm.

*5'-O-tert-Butyldiphenylsilylthymidin-3'-yl 3'-O-tert-Butyldiphenylsilylthymidin-5'-yl(1-oxido-4-methoxy-2-picolyl) phosphorothioate 5a (fast isomer).*

**4a** (0.71 g, 0.87 mmol) and 3-*O-tert*-butyldiphenylsilylthymidine (0.63 g, 1.3 mmol) were coevaporated with  $\text{CH}_2\text{Cl}_2$ -MeCN (1:1, v/v, 2 x 10 mL) and dissolved in  $\text{CH}_2\text{Cl}_2$  (7.2 mL). Pyridine (0.21 mL, 2.6 mmol) was added followed by NEP-Cl (0.48 g, 2.6 mmol). After 15 minutes the reaction was poured into 1 M TEAB (100 mL) and extracted with  $\text{CH}_2\text{Cl}_2$  (2 x

20 mL), dried Na<sub>2</sub>SO<sub>4</sub>, filtered and the solvent was evaporated. Column chromatography using CHCl<sub>3</sub> as an eluent with a gradient of isopropanol (0- 10 %) gave **5a** (0.7 g, 70%) as a white foam.  $\delta_{\text{H}}$  (CDCl<sub>3</sub>) 1.04 (18 H, s, *tert*-butyl), 1.58 (3 H, s, CH<sub>3</sub>), 1.80 (3 H, s, CH<sub>3</sub>), 2.18 (2 H, m, 2 x 2a'-H), 2.36 (2 H, m, 2 x 2b'-H), 3.77 (3 H, s, OCH<sub>3</sub>), 3.93 (4 H, m, 2 x 5'-H), 4.37 (2 H, m, 2 x 4'-H), 5.24 (2 H, d, OCH<sub>2</sub>), 5.30 (2 H, m, 2 x 3'-H), 6.33 (1 H, q, 6'-H), 6.40 (1 H, q, 6'-H), 6.78 (1 H, dd, 5''-CH), 6.87 (1 H, d, 6''-CH), 7.27-7.66 (22 H, m, 6-H and H<sub>arom</sub>), 8.21 (1 H, d 3''-CH), 9.95 (2 H, d, 2 x NH).  $\delta_{\text{P}}$  (CDCl<sub>3</sub>) 67.90 ppm.

*5'-O-tert-Butyldiphenylsilylthymidin-3'-yl 3'-O-tert-butylidiphenylsilylthymidin-5'-yl(1-oxido-4-methoxy-2-picolyl) phosphorothioate 5b (slow isomer).*

**4b** (0.33 g, 0.40 mmol) and 3-*O-tert*-butyldiphenylsilylthymidine (0.29 g, 0.6 mmol) were coevaporated with CH<sub>2</sub>Cl<sub>2</sub>-MeCN (1:1, v/v, 2 x 4 mL) and dissolved in dichloromethane (3.3 mL). Pyridine (0.1 mL, 1.2 mmol) was added followed by NEP-Cl (0.22 g, 1.2 mmol). After 15 minutes the reaction was poured into 1M TEAB (50 mL) and extracted with CH<sub>2</sub>Cl<sub>2</sub> (2 x 10 mL), dried Na<sub>2</sub>SO<sub>4</sub>, filtered and the solvent was evaporated. Column chromatography using CHCl<sub>3</sub> as an eluent with a gradient of isopropanol (0- 10 %) gave **5b** (0.35 g, 75%) as a white foam.  $\delta_{\text{H}}$  (CDCl<sub>3</sub>) 1.08 (18 H, s, *tert*-butyl), 1.60 (3 H, s, CH<sub>3</sub>), 1.81 (3 H, s, CH<sub>3</sub>), 2.09 (2 H, m, 2 x 2a'-H), 2.29 (2 H, m, 2 x 2b'-H), 3.82 (3 H, s, OCH<sub>3</sub>), 4.01 (4 H, m, 2 x 5'-H), 4.35 (2 H, m, 2 x 4'-H), 5.33 (2 H, d, OCH<sub>2</sub>), 5.30 (2 H, m, 2 x 3'-H), 6.34 (1 H, q, 6'-H), 6.42 (1 H, q, 6'-H), 6.78 (1 H, dd, 5''-CH), 6.95 (1 H, d, 6''-CH), 7.36-7.70 (22 H, m, 6-H and H<sub>arom</sub>), 7.92 (1 H, d 3''-CH), 9.86 (2 H, d, 2 x NH).  $\delta_{\text{P}}$  (CDCl<sub>3</sub>) 67.24 ppm.

*[R<sub>P</sub>]-Thymidin-3'-yl thymidin-5'-yl phosphorothioate, sodium salt 6a.*

**5a** (0.7 g, 0.6 mmol) was dissolved in pyridine-TEA-PhSH (1:1:1, v/v/v) and was stirred at RT for 2 h. Silica gel chromatography using a stepwise gradient of MeOH (0-10%) in chloroform containing 0.1% TEA gave (0.32 g 46%) of the diester.  $\delta_{\text{H}}$  (CDCl<sub>3</sub>) 1.06 (18 H, d, *tert*-butyl), 1.20 (9 H, t, 3 x CH<sub>3</sub>), 1.50 (3 H, s, CH<sub>3</sub>), 1.97 (3 H, s, CH<sub>3</sub>), 2.09 (2 H, m, 2 x 2a'-H), 2.26 (2 H, m, 2 x 2b'-H), 2.93 (6 H, q, 3 x CH<sub>2</sub>), 3.69 (2 H, m, 5'-H), 3.95 (2 H, m, 5'-H), 4.11 (1 H, m, 2 x 4'-H), 4.26 (1 H, m, 2 x 4'-H), 4.50 (1 H, m, 3'-H), 5.21 (1 H, m, 3'-H), 6.36 (1 H, q, 6'-H), 6.54 (1 H, q, 6'-H), 7.31-7.58 (10 H, m, H<sub>arom</sub>), 7.45 (1 H, d 6-H), 7.58-7.70 (10 H, m, H<sub>arom</sub>), 7.81 (1 H, d 6-H), 9.10 (1 H, s, NH) 9.32 (1 H, s, NH), 11.63 (1 H, s, NH).  $\delta_{\text{P}}$  (CDCl<sub>3</sub>) 56.90 ppm. Then, the diester (0.32 g, 0.28 mmol) and tetrabutylammonium fluoride trihydrate (0.27 g, 0.84 mmol) were dissolved in THF (0.26 mL) and stirred at RT over night. H<sub>2</sub>O (5 mL) was added and the solution was washed with ether (3 x 2 mL). The water phase was evaporated to near dryness and the product was passed through an ion-

exchange column Dowex 50-x2, 100 - 200 mesh (dry), strongly acidic cation exchange, ion form  $\text{Na}^+$ . Then the water was evaporated. The product was passed through a gel filtration column Sephadex G 10 and lyophilized giving **6a** (142 mg, 87%).  $\delta_{\text{H}}$  ( $\text{D}_2\text{O}$ ) 1.74 (3 H, s,  $\text{CH}_3$ ), 1.79 (3 H, s,  $\text{CH}_3$ ), 2.21 (3 H, m, 2 x 2a'-H and 2b'-H), 2.41 (1 H, m, 2b'-H), 3.69 (2 H, m, 5'-H), 4.01 (2 H, m, 5'-H), 4.07 (1 H, m, 4'-H), 4.44 (1 H, m, 4'-H), 4.65 (1 H, m, 3'-H), 4.82 (1 H, m, 3'-H), 6.07 (1 H, t, 6'-H), 6.18 (1 H, t, 6'-H), 7.52 (1 H, d 6-H), 7.58 (1 H, d 6-H),  $\delta_{\text{P}}$  ( $\text{D}_2\text{O}$ ) 55.79 ppm.  $\delta_{\text{C}}$  ( $\text{D}_2\text{O}$ ) 166.27, 166.21, 151.65, 151.47, 137.42, 137.38, 111.63, 111.46, 85.85, 85.76, 85.38, 85.29, 75.77, 75.71, 71.03, 61.14, 39.08, 37.80, 11.98, 11.85.

*[S<sub>P</sub>]-Thymidin-3'-yl thymidin-5'-yl phosphorothioate, sodium salt 6b.*

**5b** (0.20 g, 0.18 mmol) was dissolved in pyridine-TEA-PhSH (1:1:1, v/v/v) and was stirred at RT for 2 h. Silica gel chromatography using a stepwise gradient of MeOH (0-10%) in chloroform containing 0.1% TEA gave (0.086 g 47%) of the diester. NMR,  $\delta_{\text{H}}$  ( $\text{CDCl}_3$ ) 1.06 (18 H, d, *tert*-butyl), 1.24 (9 H, t, 3 x  $\text{CH}_3$ ), 1.56 (3 H, s,  $\text{CH}_3$ ), 1.86 (1 H, m, 2a'-H), 1.98 (3 H, s,  $\text{CH}_3$ ), 2.09 (1 H, m, 2a'-H), 2.14 (1 H, m, 2b'-H), 2.55 (1 H, m, 2b'-H), 3.01 (6 H, q, 3 x  $\text{CH}_2$ ), 3.75 (2 H, m, 5'-H), 3.98 (2 H, m, 5'-H), 4.01 (1 H, m, 2 x 4'-H), 4.20 (1 H, m, 2 x 4'-H), 4.30 (1 H, m, 3'-H), 5.29 (1 H, m, 3'-H), 6.34 (1 H, t,  $J = 6.9$  Hz, 6'-H), 6.52 (1 H, t,  $J = 6.9$  Hz, 6'-H), 7.23-7.75 (21 H, m, 6-H and  $\text{H}_{\text{arom}}$ ), 7.84 (1 H, d, 6-H), 9.54 (1 H, s, NH) 9.76 (1 H, s, NH), 11.81 (1 H, s, NH).  $\delta_{\text{P}}$  ( $\text{CDCl}_3$ ) 57.18 ppm. Then, the diester (0.10 g, 0.086 mmol) and tetrabutylammonium fluoride trihydrate (81 mg, 0.26 mmol) were dissolved in THF (0.26 mL) and stirred at RT over night.  $\text{H}_2\text{O}$  (5 mL) was added and the solution was washed with ether (3 x 2 mL). The water phase was evaporated to near dryness and the product was passed through an ion-exchange column Dowex 50-x2, 100 - 200 mesh (dry), strongly acidic cation exchange, ion form  $\text{Na}^+$ . Then the water was evaporated and the product passed through a gel filtration column Sephadex G 10 and lyophilized giving **6b** (46 mg, 92%). NMR,  $\delta_{\text{H}}$  ( $\text{D}_2\text{O}$ ) 1.74 (3 H, s,  $\text{CH}_3$ ), 1.78 (3 H, s,  $\text{CH}_3$ ), 2.22 (3 H, m, 2 x 2a'-H and 2b'-H), 2.41 (1 H, m, 2b'-H), 3.69 (2 H, m, 5'-H), 4.03 (2 H, m, 5'-H), 4.07 (1 H, m, 4'-H), 4.46 (1 H, m, 4'-H), 4.65 (1 H, m, 3'-H), 4.82 (1 H, m, 3'-H), 6.08 (1 H, t,  $J = 6.9$  Hz, 6'-H), 6.18 (1 H, t,  $J = 6.9$  Hz, 6'-H), 7.53 (1 H, d 6-H), 7.60 (1 H, d 6-H),  $\delta_{\text{P}}$  ( $\text{D}_2\text{O}$ ) 55.79 ppm.  $\delta_{\text{C}}$  ( $\text{D}_2\text{O}$ ) 166.45, 166.36, 151.74, 151.59, 137.44, 111.65, 111.53, 85.72, 85.63, 85.29, 85.16, 75.35, 75.27, 70.83, 65.50, 61.07, 38.97, 37.86, 11.88, 11.76.

*Enzymatic digestion of 6a and 6b.*

The following stock solutions were prepared: dinucleoside phosphorothioate **6a** or **6b** (5 mg, 0.009 mmol) was dissolved in buffer A [0.250 mL; 30 mM  $(\text{NH}_4)_2\text{SO}_4$  and 0.44 mM

ZnSO<sub>4</sub>] and in buffer B [0.250 mL; 50 mM Tris-HCl and 0.2 mM MgCl<sub>2</sub>]. Nuclease P1 (1 mg) was dissolved in the buffer A (0.5 mL) and snake venom phosphodiesterase (SVPD, 1.6 mg), in buffer B (0.5 mL).

The enzymatic digestion was carried out by mixing a sample of **6a** or **6b** in buffer A (0.05 mL) with nuclease P1 in buffer A (0.05 mL) or with SVPD in buffer B (0.05 mL), and the reaction mixtures were incubated at 37°C over night. TLC isopropanol-ammonia-water (7:2:1, v/v/v) revealed that nuclease P1 hydrolyzed the isomer **6b** and snake venom phosphodiesterase (SVPD) hydrolyzed the isomer **6a**. This identified configuration at the phosphorus centre in **6a** as [*R<sub>P</sub>*], and the configuration in **6b** as [*S<sub>P</sub>*].

## REFERENCES

1. Larsen, E.; Jørgensen, P. T.; Sofan, M. A.; Pedersen, E. B. *Synthesis* **1994**, 1037-1038.
2. Szabó, T.; Noréus, D.; Norrestam, R.; Stawinski, J. *Nucleic Acids Res.* **1993**, *21*, 3921-3926.
3. Patois, C.; Richard, L.; Savignac, P. *J. Chem. Soc. Perkin Trans. I* **1990**, 1577-1581.
4. Rejman, D.; Erbs, J.; Rosenberg, I. *Org. Process Res. Dev.* **2000**, *4*, 473-476.
5. Kers, A.; Kers, I.; Stawinski, J.; Sobkowski, M.; Kraszewski, A. *Synthesis* **1995**, 427-430.

| Pulse Sequence | 807.507  | 8244.792 | 69.243 | HEIGHT |
|----------------|----------|----------|--------|--------|
| 3              | 8182.018 | 67.386   | -0.3   | 118.3  |
| 4              | 8155.587 | 67.168   | 0.7    | -0.3   |
| 5              | 8116.767 | 66.848   | -0.5   | 0.7    |
| 6              | 8103.551 | 66.739   | 0.1    | -0.5   |

31 P NMR

Tb (from 4b)  
cause

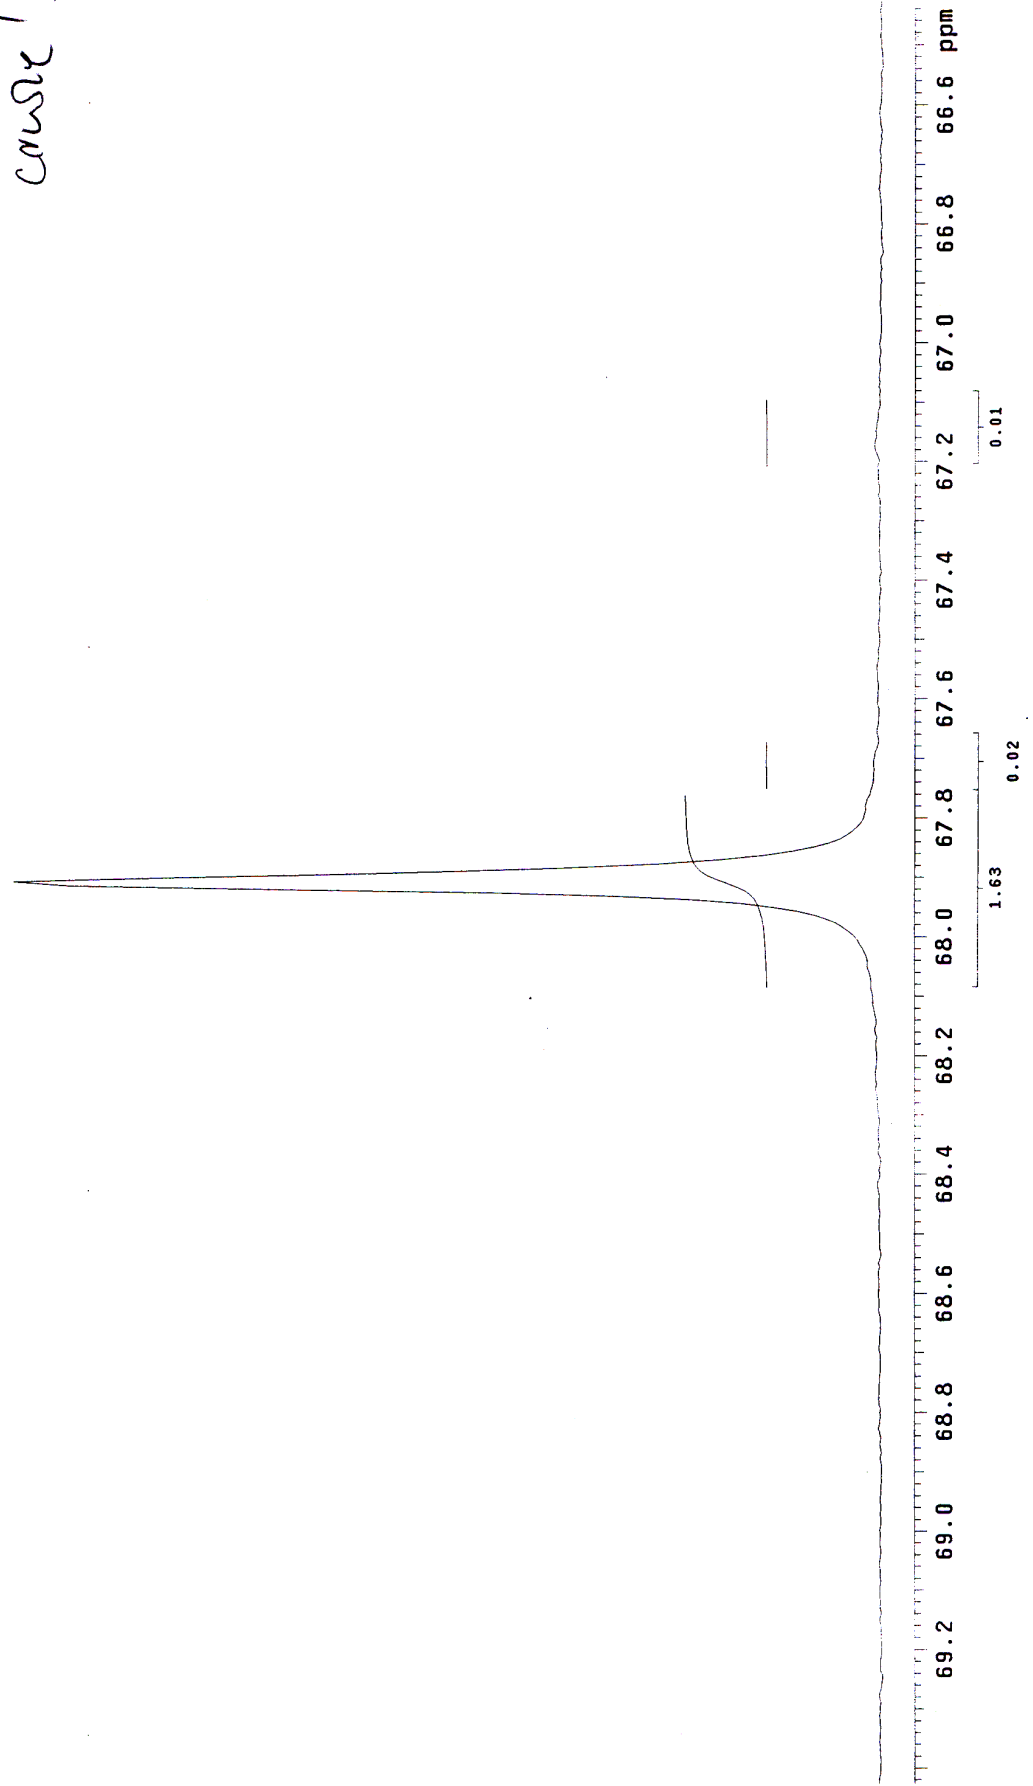

5 INDIANSONP... HEIGHT 121.0  
Pulse Sequence: 67.243

31P NMR

Ta (from Ha)  
cavity!

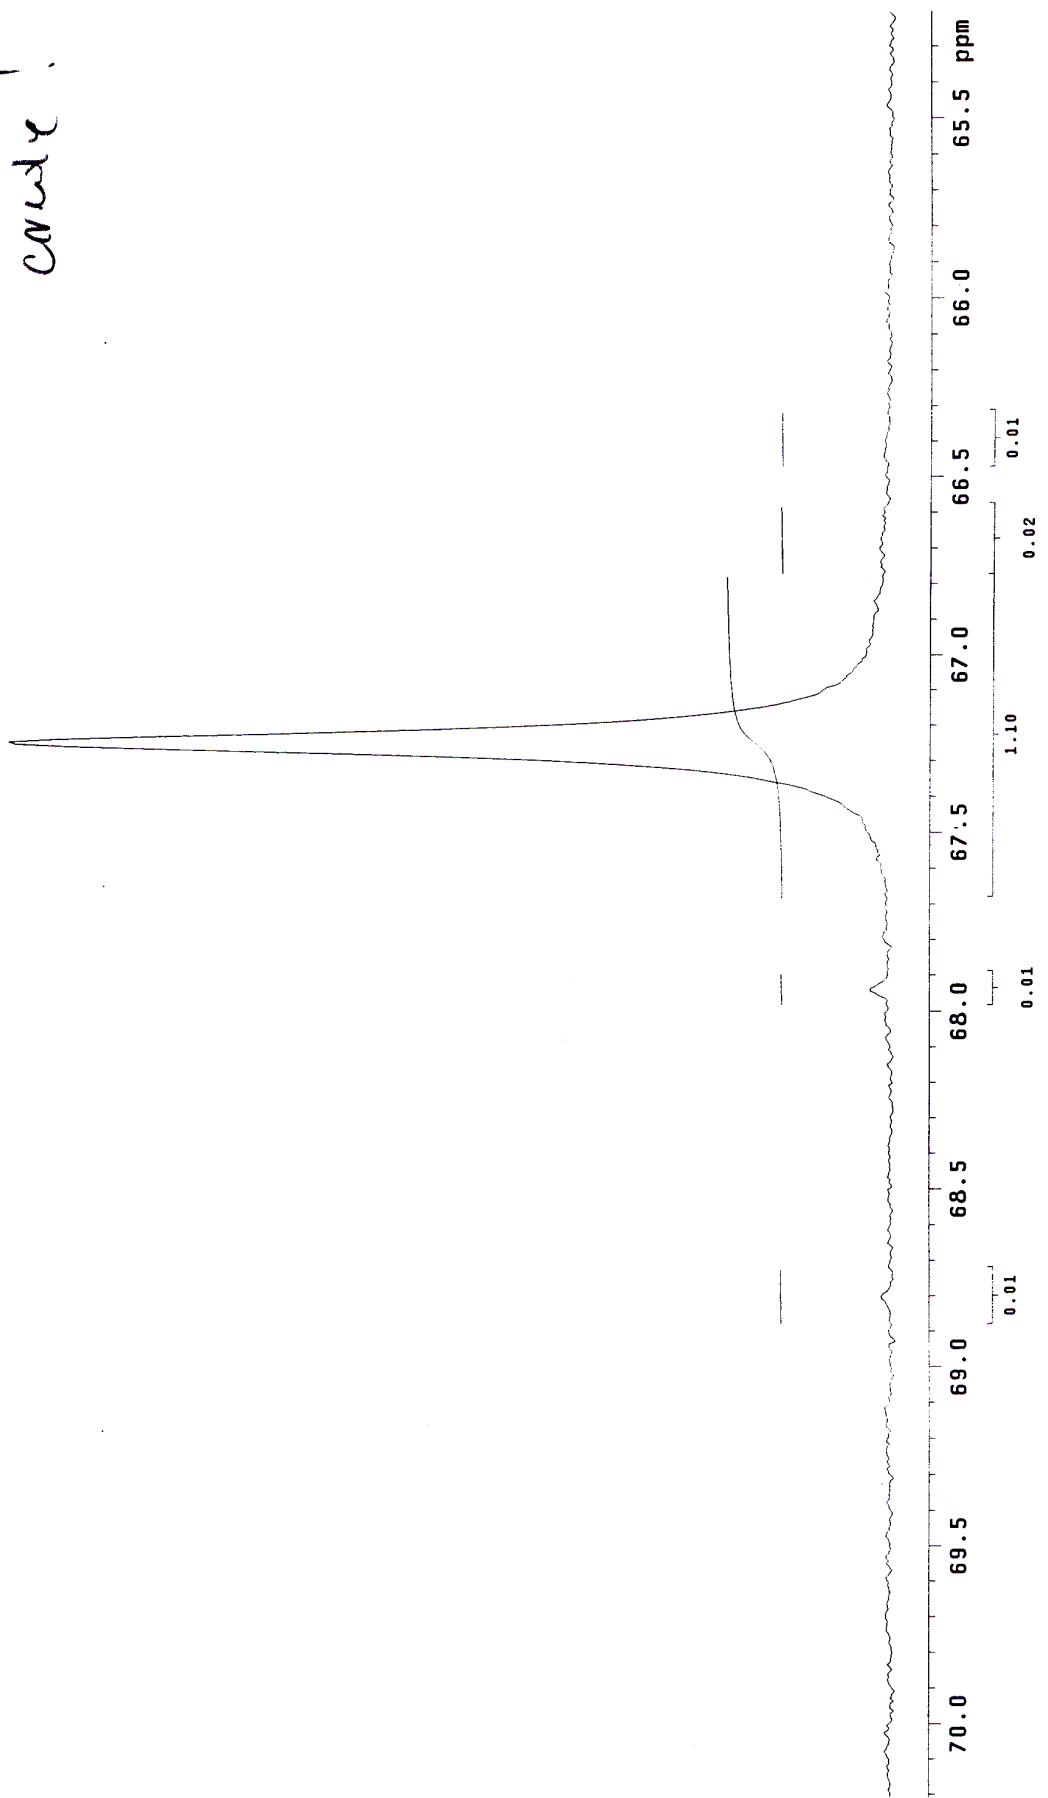

Supplement: b311912b.pdf [file b311912b.pdf]
